# Supplementary material for: Soil conditioner mixtures as an agricultural management alternative to mitigate drought impacts
Source: Copernicus journal article supplement (doi:10.5194/egusphere-2024-2566), 2024-08-30
Supplement: Supplementary file 1 [file egusphere-2024-2566-supplement.pdf]

## Supplementary information document

### **Paper: Soil conditioner mixtures as an agricultural management alternative to mitigate drought impacts.**

Juan F. Dueñas<sup>1,2</sup>, Edda, Kunze<sup>1,2</sup>, Huiying Li<sup>1,2</sup>, Matthias C. Rillig<sup>1,2</sup>

<sup>1</sup>Institute of Biology, Freie Universität Berlin, Berlin, 14195, Germany

<sup>2</sup>Berlin-Brandenburg center of Advanced Biodiversity Research, Berlin, 14195, Germany

*Correspondence to:* Juan F. Dueñas (juan.duenas@fu-berlin.de)

#### **Materials and methods**

DNA was extracted from 3 soil washes, and 76 soil samples. Soil samples were obtained from the incubation experiment by collecting 2 mL of fresh soil which were then immediately stored at -20° C. All samples were extracted by means of a DNeasy PowerSoil Kit (Qiagen, Germany). The manufacturer's protocol was followed in the case of the soil samples, while in the case of the microbial wash, minor modifications were implemented. Soil samples were sublimed at a -20° C vacuum overnight to extract all moisture present at the moment of collection. Approximately 0.25 g of dry soil per sample were subjected to extraction. The microbial wash samples (2 ml) were centrifuged at 10000 g for 2 minutes. Excess water was removed, and the remaining solution was transferred into the PowerBead tube. After the final step, all three soil wash elutions were pooled in a single tube.

DNA concentration of each sample was determined by fluorometry in a Qubit 3 apparatus (Thermo Fisher Scientific, Germany) following the manufacturer's protocol. The ratio of bacterial to fungal DNA copy number  $\text{ng}^{-1}$  of DNA was estimated per sample by means of a quantitative PCR assay. Briefly, 5  $\mu\text{l}$  of 20 % DNA template were added to 15  $\mu\text{l}$  of master mix. Since the DNA concentration of the microbial wash pool was low, 5  $\mu\text{l}$  of the undiluted extract were added to the master mix. The qPCR master mix contained 0.01 U  $\mu\text{l}^{-1}$  of KAPA HiFi polymerase (Roche, Germany), 1x Mg buffer, 0.3 mM of dNTP's mix, 0.5  $\mu\text{M}$  of EvaGreen (Jena Bioscience, Germany), sterile H<sub>2</sub>O and 0.25  $\mu\text{M}$  of forward and reverse primers. To estimate the number of bacterial DNA copies, we employed primer pair 515F–926R (Parada et al., 2016; Quince et al., 2011). To estimate fungal copy number, we employed fITS7–ITS4 set (Ihrmark et al., 2012).

Calibration curves for qPCR assays derived from custom made standards for both groups of organisms. Standards were obtained by amplifying large fragments within the rDNA operon of bacteria or fungi. Briefly, 1  $\mu\text{l}$  of a homogenized pool of soil DNA extracts (consisting of 1  $\mu\text{l}$  of each 23 samples) was used as template for these reactions. The bacterial standard (c 1600 bp) was obtained by running a 50  $\mu\text{l}$  PCRs with primers 27f–1492r (Heuer et al., 1997). The fungal standard (c. 2900 bp) was obtained in a similar fashion, using primers NS31–LR5\_F (Simon et al., 1992; Tedersoo et al., 2008). The concentration of the PCR products of these reactions were quantified fluorometrically as described before for the experimental samples. Standard DNA concentration, the target fragment size, an average molar mass  $\text{bp}^{-1}$  of 660, and the Avogadro's constant, were then used to calculate the number of double stranded DNA copies present in each standard. Finally, a serial

dilution of each standard representing a concentration gradient of template DNA was prepared (standard ladder, 7 steps).

The plate layout for the qPCR assays was set as follows: The first two columns of each plate were loaded with 15  $\mu$ l of master mix plus 5  $\mu$ l of the corresponding standard ladder, or with 5  $\mu$ l of sterile water in the case of negative controls. Four dilution steps of the standard ladder representing very high to low initial copy numbers, were replicated three times in each plate ( $n = 12$ ). Negative controls and the lowest DNA concentration of the standard dilution were replicated only twice per plate. Finally, three technical replicates of each sample, including the microbial wash sample, were loaded ( $n = 72$ ).

The qPCR program for bacteria included a denaturation phase of 3 min at 95° C; 29 cycles of denaturation at 95° C for 20 s, annealing at 54° C for 30 s, elongation at 68° C for 30s; a final elongation step at 68° C for 5 minutes; and a scanning phase of a 65°–95° C for 15 min. For fungi the initial denaturation was at 98° C for 3 min, followed by 29 cycles of denaturation at 98° C for 20 s, annealing at 50° C for 20 s, elongation at 72° C for 30 s; a final elongation step at 72° C for 5 min and a scanning phase between 65°–95° C for 15 min. We ran all qPCR assays in a CFX96 cycler (Bio-Rad Laboratories, Germany).

At the end of each run the relative fluorescence unit (RFU) scores of each well in the assay were imported into program LinRegPCR (Ruijter et al., 2009) in order to estimate PCR efficiencies per sample. Only samples with efficiencies greater than 50% were included in the analysis. The PCR efficiencies served to calculate a corrected quantification cycle (C<sub>q</sub>) for each standard and sample on the plate. The standard curve was based on the relation between the corrected C<sub>q</sub> scores of each standard dilution and their copy number estimate (Ruijter et al., 2021). A power function was fitted to this relationship (Fig. S1A, B). The equation from this fit was used to estimate the copy number of bacterial and fungal DNA present on each sample, based on their corrected C<sub>q</sub> scores.

All the data produced in this assay and used for calculations can be found in <https://doi.org/10.5281/zenodo.13311518>

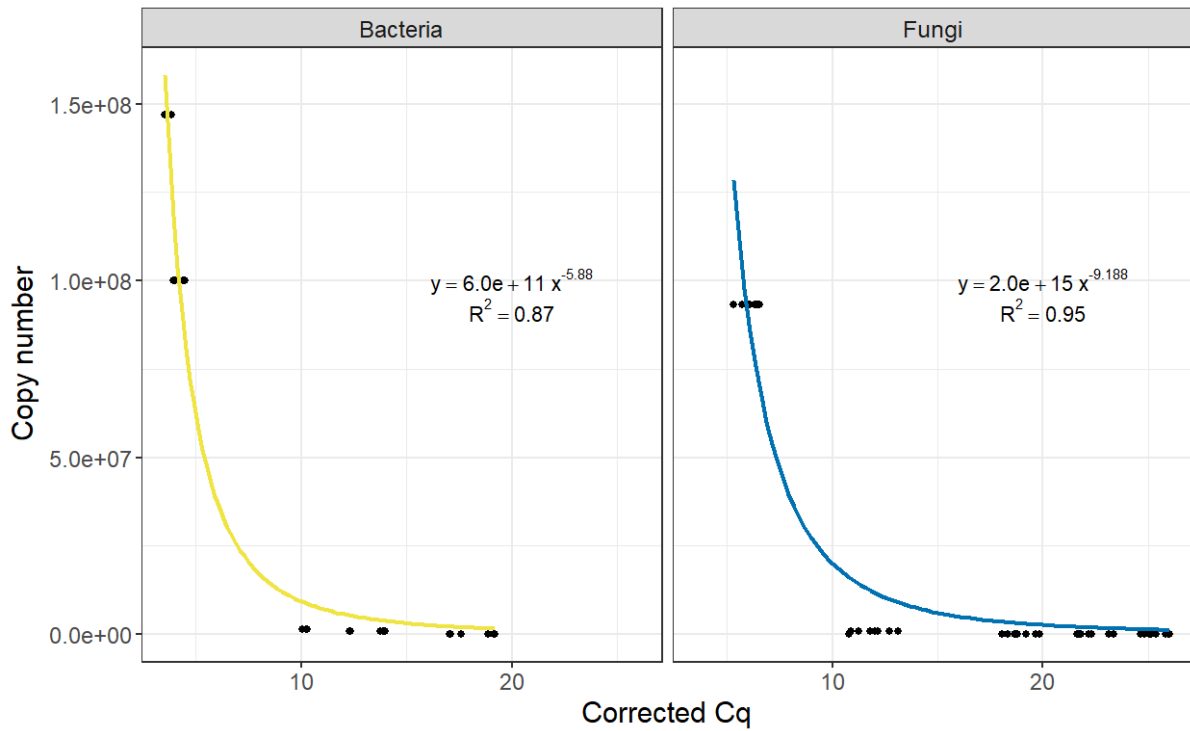

**Figure S1.** qPCR for calibration curves for A. bacteria, and B. fungi. The standard range was 1465.89–1.47E+08 for bacteria, whereas for fungi was 93.1–9.31E+07 copies. The equations corresponding to the power functions depicted in the plots were used to estimate the copy number based on the corrected Cq of each sample in the assay.

**Figure S2.** Effects of the addition of individual amendments on the soil processes measured. The effect of each amendment type is measured in relation to non-amended soils (i.e. control). Faded circles represent individual samples, while the distribution to the right represents a density function. Model coefficients are presented in Table S3.

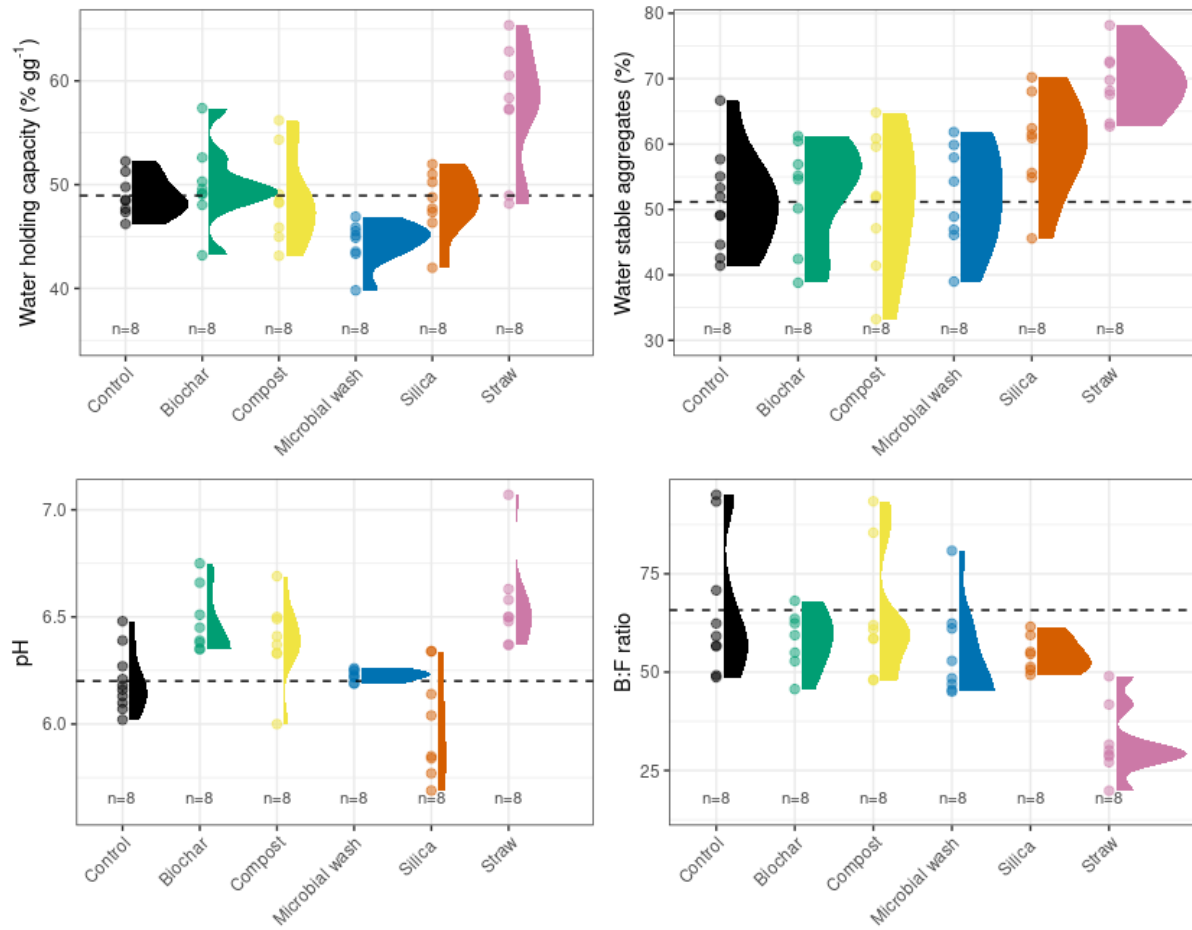

**Figure S3.** Conditioner richness compared against non-amended soils and a single conditioner at three times the individual dosage used in any of the mixtures (Biochar 3x). Each panel represents one of the variables monitored in this study. A label that describes the amendments contained on each random 3-way mixture was plotted next to the points representing a sample in this category. B=biochar, C=compost, M=microbial wash, SL=amorphous silica, SW=wheat straw.

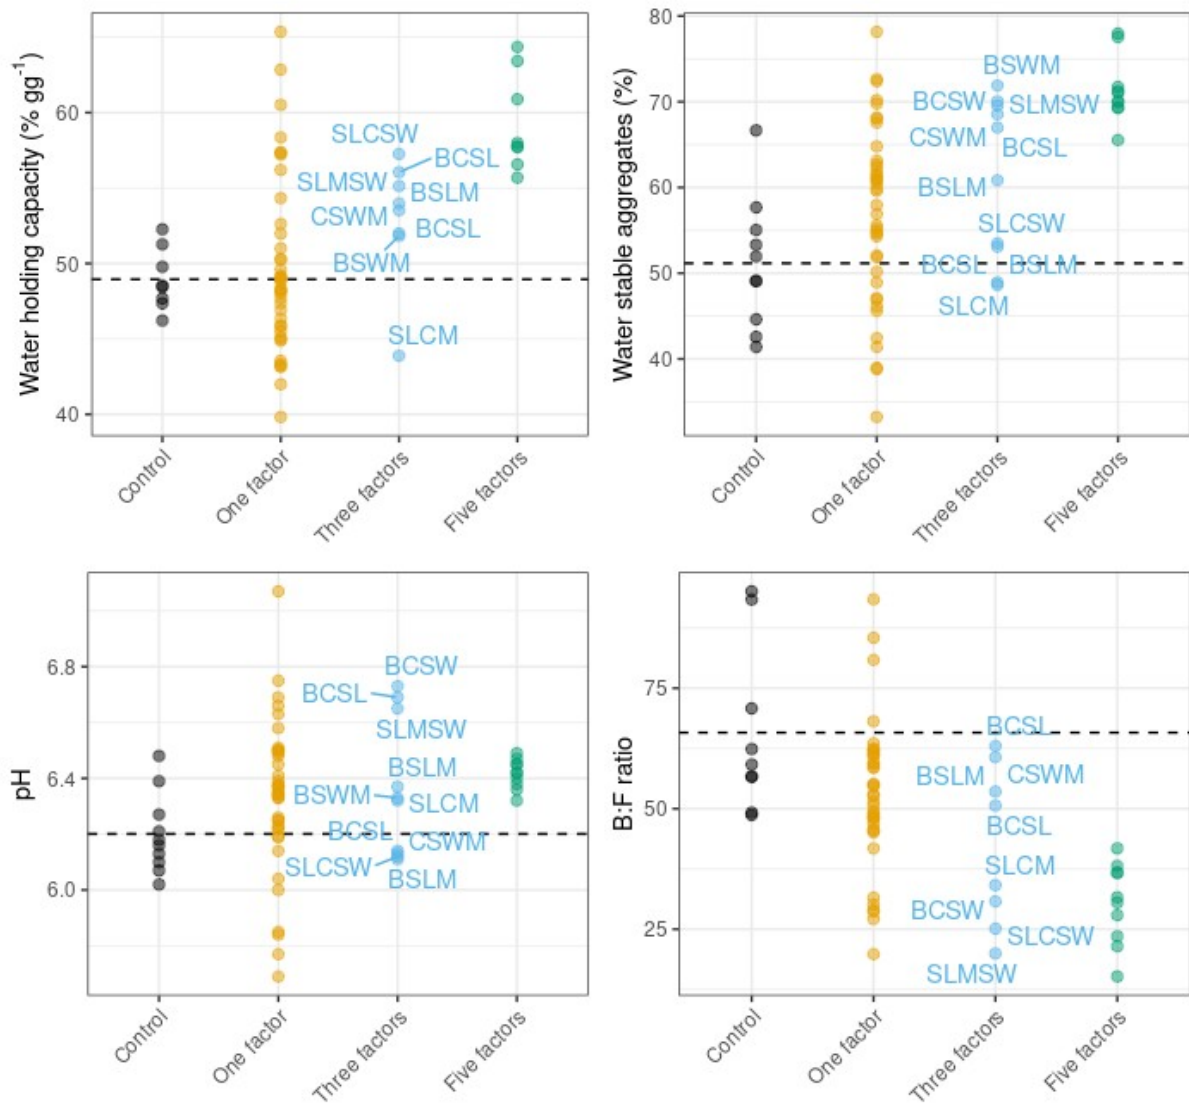

**Table S1.** Coefficients of all the models in which the number of factors is compared to the non-amended soils (Control or Intercept), and all the individual factors combined. The first two variables were fit with beta regressions while pH and B:F ratio were fitted with linear models. Consequently, the first two models contain coefficients for a precision estimate ( $\phi$ ).

| Response  | Factor    | Estimate | Std. Error | Wald Z | p     |
|-----------|-----------|----------|------------|--------|-------|
| mWHC      | Intercept | -0.042   | 0.070      | -0.599 | 0.549 |
|           | Nfactors1 | 0.032    | 0.077      | 0.411  | 0.681 |
|           | Nfactors3 | 0.159    | 0.099      | 1.609  | 0.108 |
|           | Nfactors5 | 0.416    | 0.100      | 4.167  | 0.000 |
|           | $\phi$    | 101.044  | 17.775     | 5.685  | 0.000 |
| WSA       | Intercept | 0.046    | 0.115      | 0.405  | 0.685 |
|           | Nfactors1 | 0.236    | 0.129      | 1.839  | 0.066 |
|           | Nfactors3 | 0.408    | 0.164      | 2.482  | 0.013 |
|           | Nfactors5 | 0.839    | 0.170      | 4.934  | 0.000 |
|           | $\phi$    | 29.344   | 4.881      | 6.012  | 0.000 |
| pH        | Intercept | 6.201    | 0.074      | 84.045 | 0.000 |
|           | Nfactors1 | 0.131    | 0.082      | 1.588  | 0.117 |
|           | Nfactors3 | 0.158    | 0.104      | 1.514  | 0.135 |
|           | Nfactors5 | 0.215    | 0.104      | 2.061  | 0.043 |
| B:F ratio | Intercept | 65.781   | 5.015      | 13.116 | 0.000 |
|           | Nfactors1 | -13.044  | 5.578      | -2.339 | 0.023 |
|           | Nfactors3 | -23.537  | 7.311      | -3.219 | 0.002 |
|           | Nfactors5 | -35.419  | 6.913      | -5.123 | 0.000 |

**Table S2** Model coefficients of all the models in which the number of factors is compared to the non-amended soils (Control or Intercept) and one factor at three times the concentration used on any particular mixture (Biochar, triple dosage). The first two variables were fit with beta regressions and the third (pH) is a liner model. Consequently, the first two models contain precision estimates (phi).

| Response  | Factor    | Estimate | Std. Error | Wald Z  | p     |
|-----------|-----------|----------|------------|---------|-------|
| mWHC      | Intercept | -0.042   | 0.042      | -1.010  | 0.312 |
|           | Nfactors1 | -0.015   | 0.059      | -0.257  | 0.797 |
|           | Nfactors3 | 0.160    | 0.059      | 2.713   | 0.007 |
|           | Nfactors5 | 0.419    | 0.060      | 7.026   | 0.000 |
|           | phi       | 285.521  | 71.256     | 4.007   | 0.000 |
| WSA       | Intercept | 0.047    | 0.098      | 0.477   | 0.634 |
|           | Nfactors1 | 0.179    | 0.140      | 1.280   | 0.200 |
|           | Nfactors3 | 0.412    | 0.141      | 2.919   | 0.004 |
|           | Nfactors5 | 0.848    | 0.146      | 5.800   | 0.000 |
|           | phi       | 40.246   | 8.895      | 4.524   | 0.000 |
| pH        | Intercept | 6.201    | 0.049      | 125.505 | 0.000 |
|           | Nfactors1 | 0.456    | 0.070      | 6.526   | 0.000 |
|           | Nfactors3 | 0.158    | 0.070      | 2.261   | 0.030 |
|           | Nfactors5 | 0.215    | 0.070      | 3.077   | 0.004 |
| B:F ratio | Intercept | 65.781   | 4.390      | 14.984  | 0.000 |
|           | Nfactors1 | -10.713  | 5.377      | -1.992  | 0.053 |
|           | Nfactors3 | -23.537  | 6.399      | -3.678  | 0.001 |
|           | Nfactors5 | -35.419  | 6.051      | -5.853  | 0.000 |

**Table S3** Model coefficients of the four models in which each factor added individually is compared to the non-amended soils (Control or Intercept). The first two variables were fit with beta regressions whereas pH and B:F ratio were fitted with linear models. Consequently, the first two models contain precision estimates (phi).

| Response  | Factor         | Estimate | Std. Error | Wald Z  | p     |
|-----------|----------------|----------|------------|---------|-------|
| mWHC      | Intercept      | -0.042   | 0.052      | -0.808  | 0.419 |
|           | Biochar        | 0.039    | 0.074      | 0.531   | 0.596 |
|           | Compost        | -0.007   | 0.074      | -0.095  | 0.924 |
|           | Microbial wash | -0.183   | 0.074      | -2.474  | 0.013 |
|           | Silica         | -0.031   | 0.074      | -0.419  | 0.675 |
|           | Straw          | 0.340    | 0.074      | 4.589   | 0.000 |
|           | phi            | 183.186  | 37.291     | 4.912   | 0.000 |
| WSA       | Intercept      | 0.047    | 0.096      | 0.491   | 0.623 |
|           | Biochar        | 0.050    | 0.144      | 0.351   | 0.726 |
|           | Compost        | 0.006    | 0.144      | 0.045   | 0.964 |
|           | Microbial wash | 0.027    | 0.144      | 0.186   | 0.852 |
|           | Silica         | 0.353    | 0.145      | 2.431   | 0.015 |
|           | Straw          | 0.757    | 0.150      | 5.052   | 0.000 |
|           | phi            | 42.689   | 8.442      | 5.057   | 0.000 |
| pH        | Intercept      | 6.201    | 0.057      | 109.059 | 0.000 |
|           | Biochar        | 0.279    | 0.085      | 3.271   | 0.002 |
|           | Compost        | 0.189    | 0.085      | 2.216   | 0.032 |
|           | Microbial wash | 0.025    | 0.085      | 0.296   | 0.769 |
|           | Silica         | -0.200   | 0.085      | -2.342  | 0.024 |
|           | Straw          | 0.362    | 0.085      | 4.239   | 0.000 |
| B:F ratio | Intercept      | 65.781   | 4.182      | 15.731  | 0.000 |
|           | Biochar        | -7.643   | 6.322      | -1.209  | 0.234 |
|           | Compost        | -1.419   | 6.096      | -0.233  | 0.817 |
|           | Microbial wash | -10.390  | 6.096      | -1.704  | 0.096 |
|           | Silica         | -11.210  | 6.322      | -1.773  | 0.084 |
|           | Straw          | -33.656  | 6.096      | -5.521  | 0.000 |



## References

- Heuer, H., Krsek, M., Baker, P., Smalla, K., and Wellington, E. M.: Analysis of actinomycete communities by specific amplification of genes encoding 16S rRNA and gel-electrophoretic separation in denaturing gradients, *Applied and Environmental Microbiology*, 63, 3233–3241, <https://doi.org/10.1128/aem.63.8.3233-3241.1997>, 1997.
- Ihrmark, K., Bodeker, I. T. M., Cruz-Martinez, K., Friberg, H., Kubartova, A., Schenck, J., Strid, Y., Stenlid, J., Brandstrom-Durling, M., Clemmensen, K. E., and Lindahl, B. D.: New primers to amplify the fungal ITS2 region - evaluation by 454-sequencing of artificial and natural communities, *FEMS Microbiol. Ecol.*, 82, 666–677, <https://doi.org/10.1111/j.1574-6941.2012.01437.x>, 2012.
- Parada, A. E., Needham, D. M., and Fuhrman, J. A.: Every base matters: assessing small subunit rRNA primers for marine microbiomes with mock communities, time series and global field samples, *Environmental Microbiology*, 18, 1403–1414, <https://doi.org/10.1111/1462-2920.13023>, 2016.
- Quince, C., Lanzen, A., Davenport, R. J., and Turnbaugh, P. J.: Removing noise from pyrosequenced amplicons, *BMC Bioinformatics*, 12, 38, <https://doi.org/10.1186/1471-2105-12-38>, 2011.
- Ruijter, J. M., Ramakers, C., Hoogaars, W. M. H., Karlen, Y., Bakker, O., van den Hoff, M. J. B., and Moorman, A. F. M.: Amplification efficiency: linking baseline and bias in the analysis of quantitative PCR data, *Nucleic Acids Research*, 37, e45, <https://doi.org/10.1093/nar/gkp045>, 2009.
- Ruijter, J. M., Barnewall, R. J., Marsh, I. B., Szentirmay, A. N., Quinn, J. C., van Houdt, R., Gunst, Q. D., and van den Hoff, M. J. B.: Efficiency correction is required for accurate quantitative PCR analysis and reporting, *Clinical Chemistry*, 67, 829–842, <https://doi.org/10.1093/clinchem/hvab052>, 2021.
- Simon, L., Lalonde, M., and Bruns, T. D.: Specific amplification of 18S fungal ribosomal genes from vesicular-arbuscular endomycorrhizal fungi colonizing roots, *Applied and Environmental Microbiology*, 58, 291–295, <https://doi.org/10.1128/aem.58.1.291-295.1992>, 1992.
- Tedersoo, L., Jairus, T., Horton, B. M., Abarenkov, K., Suvi, T., Saar, I., and Kõljalg, U.: Strong host preference of ectomycorrhizal fungi in a Tasmanian wet sclerophyll forest as revealed by DNA barcoding and taxon-specific primers, *New Phytologist*, 180, 479–490, <https://doi.org/10.1111/j.1469-8137.2008.02561.x>, 2008.
